# Supplementary material for: Metabolomic Analysis of Pediatric Patients with Idiosyncratic Drug-Induced Liver Injury According to the Updated RUCAM
Source: MDPI journal article supplement (doi:10.3390/ijms241713562), 2023-09-01
Supplement: s1 [file s1]

## Supplementary Material: Table S1 and S2

- Table S1: Epidemiological characteristics of 32 children with DILI and 66 children without DILI: sex, age, race. Diagnosis, drug treatment and RUMCAM score of children with DILI reported for the time of sample analysis.

| SEX    | AGE (years) | RACE      | DILI/<br>Without DILI | DIAGNOSIS                               | DRUG                        | RUCAM<br>SCORE |
|--------|-------------|-----------|-----------------------|-----------------------------------------|-----------------------------|----------------|
| Male   | 5           | Caucasian | DILI                  | Fever                                   | Ibuprofen                   | 9              |
| Female | 1           | Caucasian | DILI                  | Pneumococcal meningitis                 | Rifampicin                  | 7              |
| Female | 2           | Caucasian | DILI                  | Systemic inflammatory response syndrome | Meropenem                   | 7              |
| Female | 2           | Caucasian | DILI                  | Sepsis                                  | Meropenem                   | 6              |
| Female | 3           | Caucasian | DILI                  | Reunatoid arthritis                     | Methotrexate                | 5              |
| Male   | 1           | Caucasian | DILI                  | Tachyarrhythmia                         | Amiodarone                  | 8              |
| Male   | 1           | Caucasian | DILI                  | Cardiomyopathy                          | Propranolol                 | 7              |
| Male   | 0,5         | Caucasian | DILI                  | Sepsis                                  | Meropenem                   | 6              |
| Male   | 1           | Caucasian | DILI                  | Sepsis                                  | Meropenem                   | 4              |
| Female | 1           | Caucasian | DILI                  | Pneumonia (Candida)                     | Voriconazole                | 7              |
| Female | 3           | Caucasian | DILI                  | Seizures                                | Zonisamide                  | 8              |
| Female | 3           | Caucasian | DILI                  | Sepsis (Candida)                        | Voriconazole                | 6              |
| Male   | 5           | Caucasian | DILI                  | Sepsis (S.aureus)                       | Cloxacillin                 | 7              |
| Female | 10          | Caucasian | DILI                  | Tonsillitis                             | Amoxicillin                 | 7              |
| Male   | 15          | Caucasian | DILI                  | Ataxia-teleangiectasia                  | Cotrimoxazole               | 6              |
| Female | 14          | Caucasian | DILI                  | Encephalitis                            | Acyclovir                   | 5              |
| Female | 5           | Caucasian | DILI                  | Pulmonary tuberculosis                  | Isoniacid                   | 8              |
| Female | 3           | Caucasian | DILI                  | Hip synovitis                           | Ibuprofen                   | 6              |
| Female | 3           | Caucasian | DILI                  | Hip synovitis                           | Ibuprofen                   | 5              |
| Female | 1,5         | Caucasian | DILI                  | Juvenile idiopathic arthritis           | Methotrexate                | 4              |
| Male   | 5           | Caucasian | DILI                  | Respiratory infection                   | Amoxicillin-clavulanic acid | 6              |
| Male   | 9           | Caucasian | DILI                  | Bronchitis                              | Amoxicillin-clavulanic acid | 7              |
| Female | 1           | Caucasian | DILI                  | Respiratory infection                   | Amoxicillin-clavulanic acid | 5              |
| Male   | 0,5         | Caucasian | DILI                  | Respiratory infection                   | Amoxicillin-clavulanic acid | 4              |
| Male   | 1           | Caucasian | DILI                  | Pultaceous tonsillitis                  | Amoxicillin-clavulanic acid | 5              |
| Male   | 14          | Caucasian | DILI                  | Tonsillitis                             | Amoxicillin-clavulanic acid | 7              |
| Male   | 5           | Caucasian | DILI                  | Mastoiditis                             | Amoxicillin-clavulanic acid | 6              |
| Male   | 0,5         | Caucasian | DILI                  | Respiratory infection                   | Amoxicillin-clavulanic acid | 5              |
| Male   | 10          | Caucasian | DILI                  | Respiratory infection                   | Amoxicillin-clavulanic acid | 5              |
| Male   | 3,5         | Caucasian | DILI                  | Vomiting                                | Green anise                 | 6              |
| Male   | 4           | Caucasian | DILI                  | Vomiting                                | Green anise                 | 8              |
| Male   | 0,2         | Caucasian | DILI                  | Aerocolia                               | Horsetail (Equisetum)       | 4              |
| Female | 5           | Caucasian | Without DILI          | NA                                      | NA                          | NA             |
| Female | 3           | Caucasian | Without DILI          | NA                                      | NA                          | NA             |
| Male   | 5           | Caucasian | Without DILI          | NA                                      | NA                          | NA             |
| Female | 6           | Caucasian | Without DILI          | NA                                      | NA                          | NA             |
| Female | 6           | Caucasian | Without DILI          | NA                                      | NA                          | NA             |

| SEX    | AGE (years) | RACE      | DILI/<br>Without<br>DILI | DIAGNOSIS | DRUG | RUCAM<br>SCORE |
|--------|-------------|-----------|--------------------------|-----------|------|----------------|
| Female | 8           | Caucasian | Without DILI             | NA        | NA   | NA             |
| Male   | 9           | African   | Without DILI             | NA        | NA   | NA             |
| Male   | 4           | Caucasian | Without DILI             | NA        | NA   | NA             |
| Male   | 4           | Caucasian | Without DILI             | NA        | NA   | NA             |
| Female | 3           | Caucasian | Without DILI             | NA        | NA   | NA             |
| Female | 0,5         | Caucasian | Without DILI             | NA        | NA   | NA             |
| Male   | 1           | Caucasian | Without DILI             | NA        | NA   | NA             |
| Male   | 2           | Caucasian | Without DILI             | NA        | NA   | NA             |
| Female | 1           | African   | Without DILI             | NA        | NA   | NA             |
| Male   | 1           | Caucasian | Without DILI             | NA        | NA   | NA             |
| Female | 5           | Caucasian | Without DILI             | NA        | NA   | NA             |
| Male   | 4           | Caucasian | Without DILI             | NA        | NA   | NA             |
| Male   | 2           | Caucasian | Without DILI             | NA        | NA   | NA             |
| Male   | 3           | Caucasian | Without DILI             | NA        | NA   | NA             |
| Male   | 2           | Caucasian | Without DILI             | NA        | NA   | NA             |
| Male   | 7           | Caucasian | Without DILI             | NA        | NA   | NA             |
| Female | 5           | Caucasian | Without DILI             | NA        | NA   | NA             |
| Female | 9           | Caucasian | Without DILI             | NA        | NA   | NA             |
| Male   | 12          | Caucasian | Without DILI             | NA        | NA   | NA             |
| Female | 3           | Caucasian | Without DILI             | NA        | NA   | NA             |
| Male   | 2           | Caucasian | Without DILI             | NA        | NA   | NA             |
| Male   | 13          | Caucasian | Without DILI             | NA        | NA   | NA             |
| Male   | 11          | Caucasian | Without DILI             | NA        | NA   | NA             |
| Male   | 3           | African   | Without DILI             | NA        | NA   | NA             |
| Male   | 2           | Caucasian | Without DILI             | NA        | NA   | NA             |
| Female | 4           | Caucasian | Without DILI             | NA        | NA   | NA             |
| Male   | 5           | Caucasian | Without DILI             | NA        | NA   | NA             |
| Female | 2           | Caucasian | Without DILI             | NA        | NA   | NA             |
| Male   | 1           | Caucasian | Without DILI             | NA        | NA   | NA             |
| Female | 7           | Caucasian | Without DILI             | NA        | NA   | NA             |
| Male   | 8           | Caucasian | Without DILI             | NA        | NA   | NA             |
| Male   | 10          | Caucasian | Without DILI             | NA        | NA   | NA             |
| Female | 2           | Caucasian | Without DILI             | NA        | NA   | NA             |
| Male   | 1           | Caucasian | Without DILI             | NA        | NA   | NA             |
| Female | 3           | Caucasian | Without DILI             | NA        | NA   | NA             |
| Male   | 1           | Caucasian | Without DILI             | NA        | NA   | NA             |
| Male   | 2           | Caucasian | Without DILI             | NA        | NA   | NA             |
| Male   | 4           | Caucasian | Without DILI             | NA        | NA   | NA             |
| Male   | 4           | Caucasian | Without DILI             | NA        | NA   | NA             |
| Male   | 5           | Caucasian | Without DILI             | NA        | NA   | NA             |
| SEX    | AGE (years) | RACE      | DILI/<br>Without DILI    | DIAGNOSIS | DRUG | RUCAM<br>SCORE |

|        |    |           |              |    |    |    |
|--------|----|-----------|--------------|----|----|----|
| Male   | 6  | Caucasian | Without DILI | NA | NA | NA |
| Female | 2  | Caucasian | Without DILI | NA | NA | NA |
| Male   | 6  | Caucasian | Without DILI | NA | NA | NA |
| Male   | 10 | African   | Without DILI | NA | NA | NA |
| Male   | 12 | Caucasian | Without DILI | NA | NA | NA |
| Female | 13 | Caucasian | Without DILI | NA | NA | NA |
| Female | 2  | Caucasian | Without DILI | NA | NA | NA |
| Female | 1  | Caucasian | Without DILI | NA | NA | NA |
| Female | 2  | Caucasian | Without DILI | NA | NA | NA |
| Female | 1  | Caucasian | Without DILI | NA | NA | NA |
| Female | 2  | Caucasian | Without DILI | NA | NA | NA |
| Female | 4  | Caucasian | Without DILI | NA | NA | NA |
| Male   | 3  | Caucasian | Without DILI | NA | NA | NA |
| Male   | 6  | Caucasian | Without DILI | NA | NA | NA |
| Female | 2  | Caucasian | Without DILI | NA | NA | NA |
| Female | 4  | African   | Without DILI | NA | NA | NA |
| Male   | 3  | Caucasian | Without DILI | NA | NA | NA |
| Male   | 6  | Caucasian | Without DILI | NA | NA | NA |
| Male   | 7  | Caucasian | Without DILI | NA | NA | NA |
| Female | 2  | Caucasian | Without DILI | NA | NA | NA |
| Female | 1  | Caucasian | Without DILI | NA | NA | NA |

Abbreviations: NA = Not aplicable.

**Table S2.-** Chemical structure of the main metabolites identified in DILI samples patients.

| Metabolite               | Chemical structure                                                                   |
|--------------------------|--------------------------------------------------------------------------------------|
| Hydroxydecanoylcarnitine | 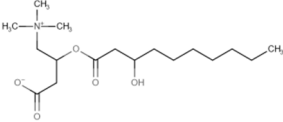   |
| Octanoylcarnitine        |    |
| Lysophosphatidylcholine  |    |
| Glycocholic acid         |   |
| Taurocholic acid         |  |
